# Supplementary material for: Correlation of national and healthcare workers COVID-19 infection data; implications for large-scale viral testing programs
Source: PubMed Central journal article supplement (PMC8064524; doi:10.1371/journal.pone.0250699), 2021-04-23
Supplement: pone.0250699.s001.pdf [file pone.0250699.s001.pdf]

## S1 File

# Correlation of National and Healthcare Workers COVID-19 Infection Data; Implications for Large-scale Viral Testing Programs

Dan Wu,<sup>1</sup> Pól Mac Aonghusa,<sup>2</sup> Donal F. O'Shea\*<sup>1</sup>

- 1 Department of Chemistry, Royal College of Surgeons in Ireland, Dublin 2, Ireland
- 2 IBM Research – Ireland, Damastown Industrial Estate, Mulhuddart, Dublin 15, Ireland

### Legends for Supporting Movies

- SI Movie 1.** Fitted logistic cures with prediction intervals for Ireland
- SI Movie 2.** Fitted logistic cures with prediction intervals for South Korea
- SI Movie 3.** Fitted logistic cures with prediction intervals for Germany
- SI Movie 4.** Fitted logistic cures with prediction intervals for UK
- SI Movie 5.** Fitted logistic cures with prediction intervals for Iceland

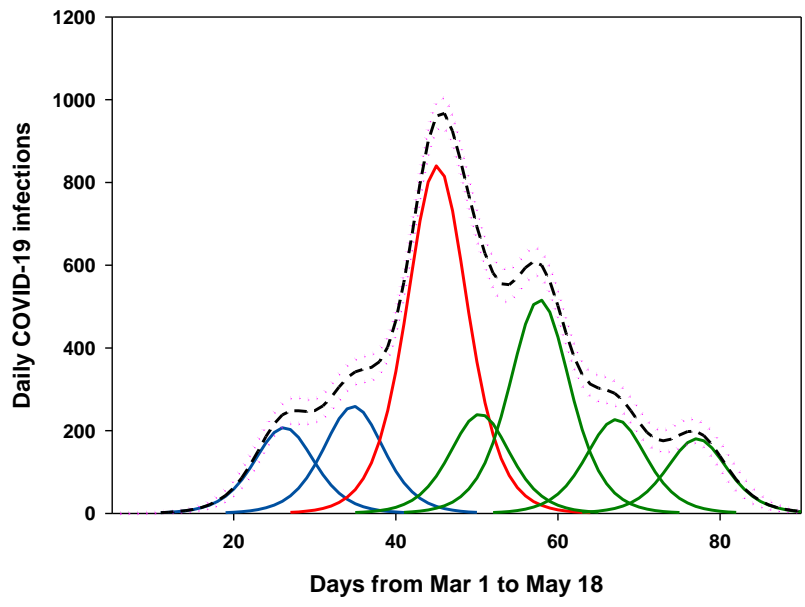

Figure S1. Fitted logistic curves for Ireland showing 95% confidence intervals (dotted purple trace)

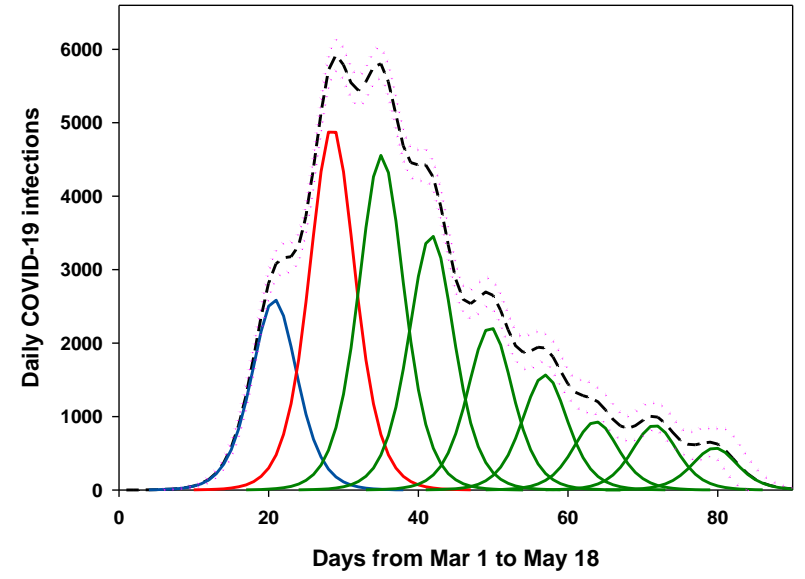

Figure S2. Fitted logistic curves for Germany showing 95% confidence intervals (dotted purple trace)

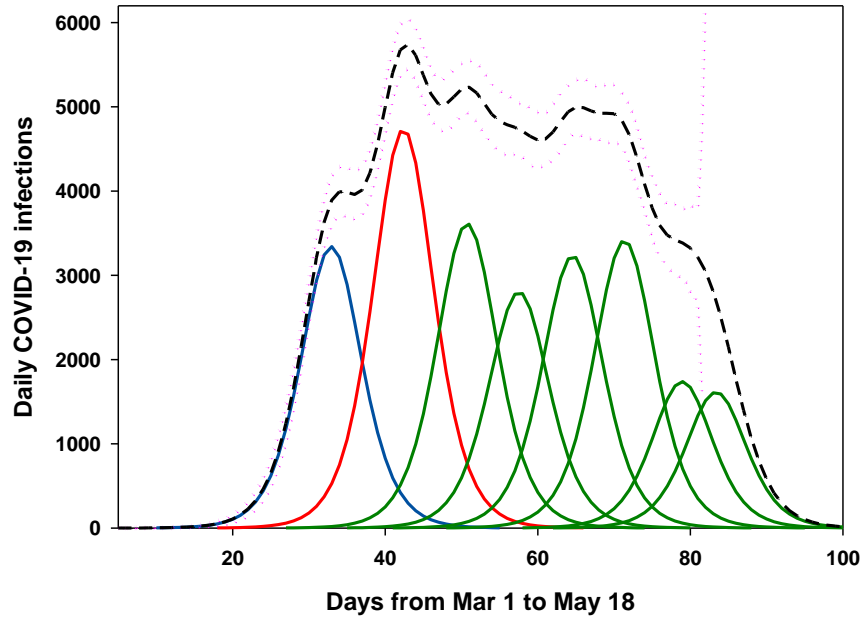

**Figure S3.** Fitted logistic curves for UK showing 95% confidence intervals (dotted purple trace).

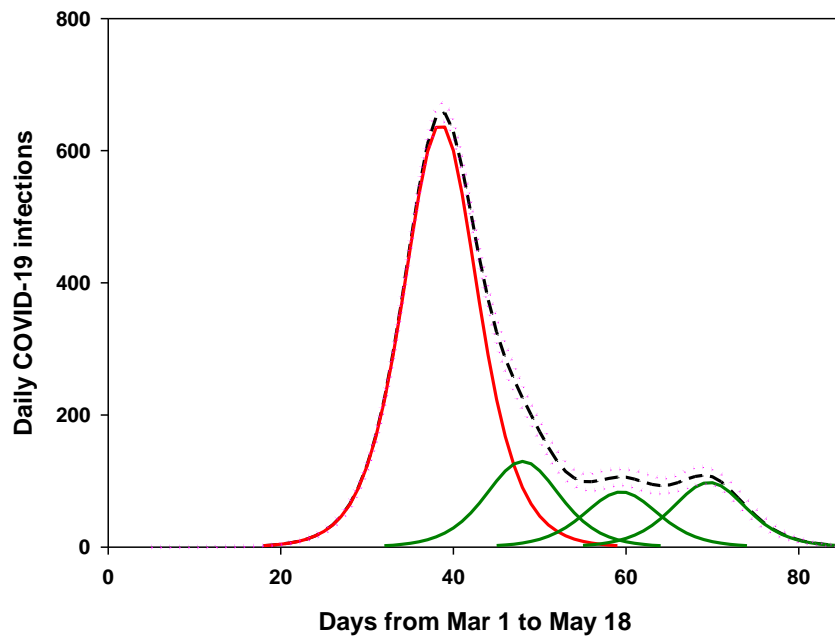

**Figure S4.** Fitted logistic curves for South Korea showing 95% confidence intervals (dotted purple trace).

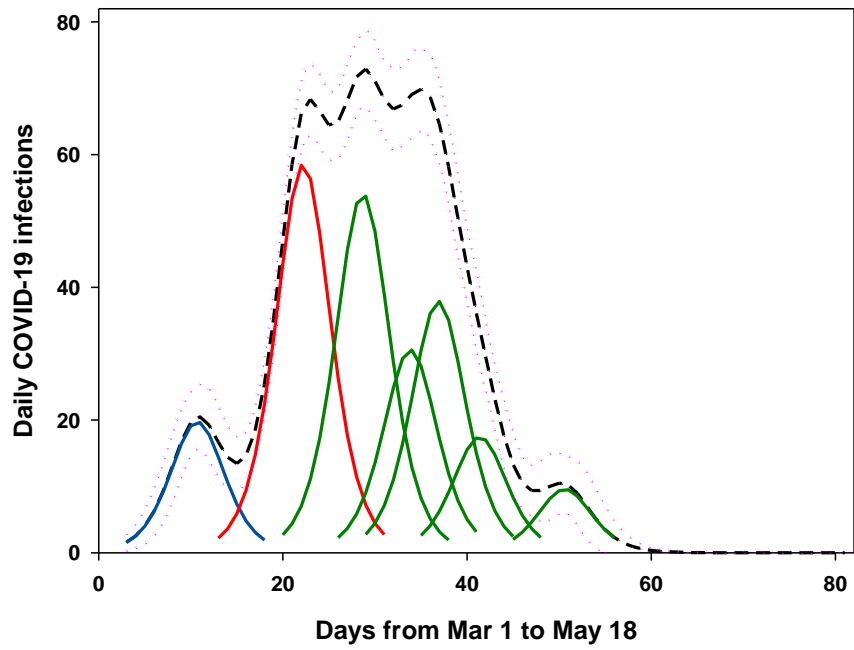

**Figure S5.** Fitted logistic curves for Iceland showing 95% confidence intervals (dotted purple trace).

**Table S1.** Data for Spearman test of set and subset

| X values | Y values | $X_{Ra}$ | $X_{Ra} - M_x$ | $Y_{Ra}$ | $Y_{Ra} - M_y$ | Sum Diffs |
|----------|----------|----------|----------------|----------|----------------|-----------|
| 185.4    | 40.4     | 2.00     | -25.00         | 1.00     | -26.00         | 650.00    |
| 213.6    | 47.4     | 11.50    | -15.50         | 2.00     | -25.00         | 387.50    |
| 250.2    | 51.8     | 14.00    | -13.00         | 3.00     | -24.00         | 312.00    |
| 262.4    | 59       | 16.00    | -11.00         | 4.00     | -23.00         | 253.00    |
| 259.6    | 65.2     | 15.00    | -12.00         | 5.00     | -22.00         | 264.00    |
| 271      | 75.4     | 17.00    | -10.00         | 6.00     | -21.00         | 210.00    |
| 276.4    | 79.2     | 18.00    | -9.00          | 7.00     | -20.00         | 180.00    |
| 288.6    | 88.4     | 20.00    | -7.00          | 14.00    | -13.00         | 91.00     |
| 308.4    | 81.2     | 22.00    | -5.00          | 8.00     | -19.00         | 95.00     |
| 353.4    | 83.2     | 26.00    | -1.00          | 12.00    | -15.00         | 15.00     |
| 385.4    | 82.2     | 28.00    | 1.00           | 10.50    | -16.50         | -16.50    |
| 462.4    | 89.4     | 31.00    | 4.00           | 15.00    | -12.00         | -48.00    |
| 466      | 104      | 32.00    | 5.00           | 20.00    | -7.00          | -35.00    |
| 486.2    | 136.2    | 33.00    | 6.00           | 29.00    | 2.00           | 12.00     |
| 525.6    | 157.2    | 35.00    | 8.00           | 33.00    | 6.00           | 48.00     |
| 574.2    | 175.6    | 38.00    | 11.00          | 39.00    | 12.00          | 132.00    |
| 581.4    | 184.8    | 40.00    | 13.00          | 43.00    | 16.00          | 208.00    |
| 700.8    | 184.2    | 46.00    | 19.00          | 41.00    | 14.00          | 266.00    |
| 789      | 188.4    | 48.00    | 21.00          | 45.00    | 18.00          | 378.00    |
| 838.8    | 184.6    | 49.00    | 22.00          | 42.00    | 15.00          | 330.00    |
| 928.4    | 189.8    | 53.00    | 26.00          | 46.00    | 19.00          | 494.00    |
| 903.2    | 207      | 52.00    | 25.00          | 48.00    | 21.00          | 525.00    |
| 852.4    | 216.8    | 51.00    | 24.00          | 51.00    | 24.00          | 576.00    |
| 845.2    | 216.2    | 50.00    | 23.00          | 50.00    | 23.00          | 529.00    |
| 785.8    | 227.4    | 47.00    | 20.00          | 53.00    | 26.00          | 520.00    |
| 610.4    | 218      | 43.00    | 16.00          | 52.00    | 25.00          | 400.00    |
| 585.8    | 209.2    | 41.00    | 14.00          | 49.00    | 22.00          | 308.00    |
| 553      | 194.4    | 36.00    | 9.00           | 47.00    | 20.00          | 180.00    |
| 577.2    | 185      | 39.00    | 12.00          | 44.00    | 17.00          | 204.00    |
| 572.4    | 167.6    | 37.00    | 10.00          | 36.00    | 9.00           | 90.00     |
| 608.8    | 176.8    | 42.00    | 15.00          | 40.00    | 13.00          | 195.00    |
| 654      | 162.2    | 45.00    | 18.00          | 34.00    | 7.00           | 126.00    |
| 623      | 173.8    | 44.00    | 17.00          | 38.00    | 11.00          | 187.00    |
| 493.8    | 171      | 34.00    | 7.00           | 37.00    | 10.00          | 70.00     |
| 460.4    | 167.4    | 30.00    | 3.00           | 35.00    | 8.00           | 24.00     |
| 446.4    | 155.2    | 29.00    | 2.00           | 32.00    | 5.00           | 10.00     |
| 354.8    | 153.8    | 27.00    | 0.00           | 31.00    | 4.00           | 0.00      |
| 343.6    | 130.8    | 24.00    | -3.00          | 26.00    | -1.00          | 3.00      |
| 350.2    | 128.6    | 25.00    | -2.00          | 25.00    | -2.00          | 4.00      |
| 318.4    | 121.8    | 23.00    | -4.00          | 23.00    | -4.00          | 16.00     |
| 288.4    | 110.6    | 19.00    | -8.00          | 22.00    | -5.00          | 40.00     |
| 297.6    | 105      | 21.00    | -6.00          | 21.00    | -6.00          | 36.00     |
| 248.8    | 103.6    | 13.00    | -14.00         | 19.00    | -8.00          | 112.00    |
| 213      | 91.6     | 10.00    | -17.00         | 17.00    | -10.00         | 170.00    |
| 202.6    | 95.6     | 7.00     | -20.00         | 18.00    | -9.00          | 180.00    |

|       |       |       |        |       |        |        |
|-------|-------|-------|--------|-------|--------|--------|
| 208.4 | 88.2  | 8.50  | -18.50 | 13.00 | -14.00 | 259.00 |
| 192   | 81.6  | 6.00  | -21.00 | 9.00  | -18.00 | 378.00 |
| 186.8 | 82.2  | 3.00  | -24.00 | 10.50 | -16.50 | 396.00 |
| 173.6 | 90.8  | 1.00  | -26.00 | 16.00 | -11.00 | 286.00 |
| 213.6 | 131.2 | 11.50 | -15.50 | 27.00 | 0.00   | 0.00   |
| 208.4 | 139.2 | 8.50  | -18.50 | 30.00 | 3.00   | -55.50 |
| 191.6 | 132   | 5.00  | -22.00 | 28.00 | 1.00   | -22.00 |
| 190.8 | 123.6 | 4.00  | -23.00 | 24.00 | -3.00  | 69.00  |
|       |       |       |        |       |        |        |

Covariance = 10041.5 / 52 = 193.11

R = 193.11 / (15.44 \* 15.44) = 0.81

rs = 0.80972, p (2-tailed) = 0.

**Table S2.** Data for Spearman test of set-subset and subset.

| X values | Y values | $X_{Ra}$ | $X_{Ra} - M_x$ | $Y_{Ra}$ | $Y_{Ra} - M_y$ | Sum Diffs |
|----------|----------|----------|----------------|----------|----------------|-----------|
| 145      | 40.4     | 11.00    | -16.00         | 1.00     | -26.00         | 416.00    |
| 166.2    | 47.4     | 13.00    | -14.00         | 2.00     | -25.00         | 350.00    |
| 198.4    | 51.8     | 20.00    | -7.00          | 3.00     | -24.00         | 168.00    |
| 203.4    | 59       | 23.00    | -4.00          | 4.00     | -23.00         | 92.00     |
| 194.4    | 65.2     | 16.00    | -11.00         | 5.00     | -22.00         | 242.00    |
| 195.6    | 75.4     | 17.00    | -10.00         | 6.00     | -21.00         | 210.00    |
| 197.2    | 79.2     | 19.00    | -8.00          | 7.00     | -20.00         | 160.00    |
| 200.2    | 88.4     | 21.00    | -6.00          | 14.00    | -13.00         | 78.00     |
| 227.2    | 81.2     | 26.00    | -1.00          | 8.00     | -19.00         | 19.00     |
| 270.2    | 83.2     | 27.00    | 0.00           | 12.00    | -15.00         | 0.00      |
| 303.2    | 82.2     | 30.00    | 3.00           | 10.50    | -16.50         | -49.50    |
| 373      | 89.4     | 36.00    | 9.00           | 15.00    | -12.00         | -108.00   |
| 362      | 104      | 34.00    | 7.00           | 20.00    | -7.00          | -49.00    |
| 350      | 136.2    | 32.00    | 5.00           | 29.00    | 2.00           | 10.00     |
| 368.4    | 157.2    | 35.00    | 8.00           | 33.00    | 6.00           | 48.00     |
| 398.6    | 175.6    | 41.00    | 14.00          | 39.00    | 12.00          | 168.00    |
| 396.6    | 184.8    | 40.00    | 13.00          | 43.00    | 16.00          | 208.00    |
| 516.6    | 184.2    | 46.00    | 19.00          | 41.00    | 14.00          | 266.00    |
| 600.6    | 188.4    | 48.00    | 21.00          | 45.00    | 18.00          | 378.00    |
| 654.2    | 184.6    | 51.00    | 24.00          | 42.00    | 15.00          | 360.00    |
| 738.6    | 189.8    | 53.00    | 26.00          | 46.00    | 19.00          | 494.00    |
| 696.2    | 207      | 52.00    | 25.00          | 48.00    | 21.00          | 525.00    |
| 635.6    | 216.8    | 50.00    | 23.00          | 51.00    | 24.00          | 552.00    |
| 629      | 216.2    | 49.00    | 22.00          | 50.00    | 23.00          | 506.00    |
| 558.4    | 227.4    | 47.00    | 20.00          | 53.00    | 26.00          | 520.00    |
| 392.4    | 218      | 39.00    | 12.00          | 52.00    | 25.00          | 300.00    |
| 376.6    | 209.2    | 37.00    | 10.00          | 49.00    | 22.00          | 220.00    |
| 358.6    | 194.4    | 33.00    | 6.00           | 47.00    | 20.00          | 120.00    |

|       |       |       |        |       |        |        |
|-------|-------|-------|--------|-------|--------|--------|
| 392.2 | 185   | 38.00 | 11.00  | 44.00 | 17.00  | 187.00 |
| 404.8 | 167.6 | 42.00 | 15.00  | 36.00 | 9.00   | 135.00 |
| 432   | 176.8 | 43.00 | 16.00  | 40.00 | 13.00  | 208.00 |
| 491.8 | 162.2 | 45.00 | 18.00  | 34.00 | 7.00   | 126.00 |
| 449.2 | 173.8 | 44.00 | 17.00  | 38.00 | 11.00  | 187.00 |
| 322.8 | 171   | 31.00 | 4.00   | 37.00 | 10.00  | 40.00  |
| 293   | 167.4 | 29.00 | 2.00   | 35.00 | 8.00   | 16.00  |
| 291.2 | 155.2 | 28.00 | 1.00   | 32.00 | 5.00   | 5.00   |
| 201   | 153.8 | 22.00 | -5.00  | 31.00 | 4.00   | -20.00 |
| 212.8 | 130.8 | 24.00 | -3.00  | 26.00 | -1.00  | 3.00   |
| 221.6 | 128.6 | 25.00 | -2.00  | 25.00 | -2.00  | 4.00   |
| 196.6 | 121.8 | 18.00 | -9.00  | 23.00 | -4.00  | 36.00  |
| 177.8 | 110.6 | 14.00 | -13.00 | 22.00 | -5.00  | 65.00  |
| 192.6 | 105   | 15.00 | -12.00 | 21.00 | -6.00  | 72.00  |
| 145.2 | 103.6 | 12.00 | -15.00 | 19.00 | -8.00  | 120.00 |
| 121.4 | 91.6  | 10.00 | -17.00 | 17.00 | -10.00 | 170.00 |
| 107   | 95.6  | 7.00  | -20.00 | 18.00 | -9.00  | 180.00 |
| 120.2 | 88.2  | 9.00  | -18.00 | 13.00 | -14.00 | 252.00 |
| 110.4 | 81.6  | 8.00  | -19.00 | 9.00  | -18.00 | 342.00 |
| 104.6 | 82.2  | 6.00  | -21.00 | 10.50 | -16.50 | 346.50 |
| 82.8  | 90.8  | 5.00  | -22.00 | 16.00 | -11.00 | 242.00 |
| 82.4  | 131.2 | 4.00  | -23.00 | 27.00 | 0.00   | 0.00   |
| 69.2  | 139.2 | 3.00  | -24.00 | 30.00 | 3.00   | -72.00 |
| 59.6  | 132   | 1.00  | -26.00 | 28.00 | 1.00   | -26.00 |
| 67.2  | 123.6 | 2.00  | -25.00 | 24.00 | -3.00  | 75.00  |
|       |       |       |        |       |        |        |

Covariance = 8897 / 52 = 171.1

$R = 171.1 / (15.44 * 15.44) = 0.717$

$r_s = 0.7174$ ,  $p$  (2-tailed) = 0.

**Table S3:** Data for Spearman test of set and set-subset.

| X values | Y values | $X_{Ra}$ | $X_{Ra} - M_x$ | $Y_{Ra}$ | $Y_{Ra} - M_y$ | Sum Diffs |
|----------|----------|----------|----------------|----------|----------------|-----------|
| 185.4    | 145      | 2.00     | -25.00         | 11.00    | -16.00         | 400.00    |
| 213.6    | 166.2    | 11.50    | -15.50         | 13.00    | -14.00         | 217.00    |
| 250.2    | 198.4    | 14.00    | -13.00         | 20.00    | -7.00          | 91.00     |
| 262.4    | 203.4    | 16.00    | -11.00         | 23.00    | -4.00          | 44.00     |
| 259.6    | 194.4    | 15.00    | -12.00         | 16.00    | -11.00         | 132.00    |
| 271      | 195.6    | 17.00    | -10.00         | 17.00    | -10.00         | 100.00    |
| 276.4    | 197.2    | 18.00    | -9.00          | 19.00    | -8.00          | 72.00     |
| 288.6    | 200.2    | 20.00    | -7.00          | 21.00    | -6.00          | 42.00     |
| 308.4    | 227.2    | 22.00    | -5.00          | 26.00    | -1.00          | 5.00      |
| 353.4    | 270.2    | 26.00    | -1.00          | 27.00    | 0.00           | 0.00      |

|       |       |       |        |       |        |        |
|-------|-------|-------|--------|-------|--------|--------|
| 385.4 | 303.2 | 28.00 | 1.00   | 30.00 | 3.00   | 3.00   |
| 462.4 | 373   | 31.00 | 4.00   | 36.00 | 9.00   | 36.00  |
| 466   | 362   | 32.00 | 5.00   | 34.00 | 7.00   | 35.00  |
| 486.2 | 350   | 33.00 | 6.00   | 32.00 | 5.00   | 30.00  |
| 525.6 | 368.4 | 35.00 | 8.00   | 35.00 | 8.00   | 64.00  |
| 574.2 | 398.6 | 38.00 | 11.00  | 41.00 | 14.00  | 154.00 |
| 581.4 | 396.6 | 40.00 | 13.00  | 40.00 | 13.00  | 169.00 |
| 700.8 | 516.6 | 46.00 | 19.00  | 46.00 | 19.00  | 361.00 |
| 789   | 600.6 | 48.00 | 21.00  | 48.00 | 21.00  | 441.00 |
| 838.8 | 654.2 | 49.00 | 22.00  | 51.00 | 24.00  | 528.00 |
| 928.4 | 738.6 | 53.00 | 26.00  | 53.00 | 26.00  | 676.00 |
| 903.2 | 696.2 | 52.00 | 25.00  | 52.00 | 25.00  | 625.00 |
| 852.4 | 635.6 | 51.00 | 24.00  | 50.00 | 23.00  | 552.00 |
| 845.2 | 629   | 50.00 | 23.00  | 49.00 | 22.00  | 506.00 |
| 785.8 | 558.4 | 47.00 | 20.00  | 47.00 | 20.00  | 400.00 |
| 610.4 | 392.4 | 43.00 | 16.00  | 39.00 | 12.00  | 192.00 |
| 585.8 | 376.6 | 41.00 | 14.00  | 37.00 | 10.00  | 140.00 |
| 553   | 358.6 | 36.00 | 9.00   | 33.00 | 6.00   | 54.00  |
| 577.2 | 392.2 | 39.00 | 12.00  | 38.00 | 11.00  | 132.00 |
| 572.4 | 404.8 | 37.00 | 10.00  | 42.00 | 15.00  | 150.00 |
| 608.8 | 432   | 42.00 | 15.00  | 43.00 | 16.00  | 240.00 |
| 654   | 491.8 | 45.00 | 18.00  | 45.00 | 18.00  | 324.00 |
| 623   | 449.2 | 44.00 | 17.00  | 44.00 | 17.00  | 289.00 |
| 493.8 | 322.8 | 34.00 | 7.00   | 31.00 | 4.00   | 28.00  |
| 460.4 | 293   | 30.00 | 3.00   | 29.00 | 2.00   | 6.00   |
| 446.4 | 291.2 | 29.00 | 2.00   | 28.00 | 1.00   | 2.00   |
| 354.8 | 201   | 27.00 | 0.00   | 22.00 | -5.00  | 0.00   |
| 343.6 | 212.8 | 24.00 | -3.00  | 24.00 | -3.00  | 9.00   |
| 350.2 | 221.6 | 25.00 | -2.00  | 25.00 | -2.00  | 4.00   |
| 318.4 | 196.6 | 23.00 | -4.00  | 18.00 | -9.00  | 36.00  |
| 288.4 | 177.8 | 19.00 | -8.00  | 14.00 | -13.00 | 104.00 |
| 297.6 | 192.6 | 21.00 | -6.00  | 15.00 | -12.00 | 72.00  |
| 248.8 | 145.2 | 13.00 | -14.00 | 12.00 | -15.00 | 210.00 |
| 213   | 121.4 | 10.00 | -17.00 | 10.00 | -17.00 | 289.00 |
| 202.6 | 107   | 7.00  | -20.00 | 7.00  | -20.00 | 400.00 |
| 208.4 | 120.2 | 8.50  | -18.50 | 9.00  | -18.00 | 333.00 |
| 192   | 110.4 | 6.00  | -21.00 | 8.00  | -19.00 | 399.00 |
| 186.8 | 104.6 | 3.00  | -24.00 | 6.00  | -21.00 | 504.00 |
| 173.6 | 82.8  | 1.00  | -26.00 | 5.00  | -22.00 | 572.00 |
| 213.6 | 82.4  | 11.50 | -15.50 | 4.00  | -23.00 | 356.50 |
| 208.4 | 69.2  | 8.50  | -18.50 | 3.00  | -24.00 | 444.00 |
| 191.6 | 59.6  | 5.00  | -22.00 | 1.00  | -26.00 | 572.00 |
| 190.8 | 67.2  | 4.00  | -23.00 | 2.00  | -25.00 | 575.00 |
|       |       |       |        |       |        |        |



Covariance = 12119.5 / 52 = 233.07

R = 233.07 / (15.44 \* 15.44) = 0.977

rs = 0.97726, p (2-tailed) = 0.

**Table S4:** Data for Pearson's coefficient test of set and subset

| X values | Y values | X - M <sub>x</sub> | Y - M <sub>y</sub> | (X - M <sub>x</sub> ) <sup>2</sup> | (Y - M <sub>y</sub> ) <sup>2</sup> | (X - M <sub>x</sub> )(Y - M <sub>y</sub> ) |
|----------|----------|--------------------|--------------------|------------------------------------|------------------------------------|--------------------------------------------|
| 185.4000 | 40.4000  | -251.611           | -93.672            | 63308.257                          | 8774.387                           | 23568.860                                  |
| 213.6000 | 47.4000  | -223.411           | -86.672            | 49912.618                          | 7511.983                           | 19363.439                                  |
| 250.2000 | 51.8000  | -186.811           | -82.272            | 34898.470                          | 6768.632                           | 15369.285                                  |
| 262.4000 | 59.0000  | -174.611           | -75.072            | 30489.113                          | 5635.760                           | 13108.368                                  |
| 259.6000 | 65.2000  | -177.411           | -68.872            | 31474.777                          | 4743.311                           | 12218.619                                  |
| 271.0000 | 75.4000  | -166.011           | -58.672            | 27559.759                          | 3442.368                           | 9740.166                                   |
| 276.4000 | 79.2000  | -160.611           | -54.872            | 25795.996                          | 3010.903                           | 8813.016                                   |
| 288.6000 | 88.4000  | -148.411           | -45.672            | 22025.920                          | 2085.904                           | 6778.197                                   |
| 308.4000 | 81.2000  | -128.611           | -52.872            | 16540.872                          | 2795.416                           | 6799.899                                   |
| 353.4000 | 83.2000  | -83.611            | -50.872            | 6990.853                           | 2587.930                           | 4253.450                                   |
| 385.4000 | 82.2000  | -51.611            | -51.872            | 2663.728                           | 2690.673                           | 2677.167                                   |
| 462.4000 | 89.4000  | 25.389             | -44.672            | 644.585                            | 1995.561                           | -1134.155                                  |
| 466.0000 | 104.0000 | 28.989             | -30.072            | 840.344                            | 904.307                            | -871.739                                   |
| 486.2000 | 136.2000 | 49.189             | 2.128              | 2419.526                           | 4.530                              | 104.688                                    |
| 525.6000 | 157.2000 | 88.589             | 23.128             | 7847.954                           | 534.918                            | 2048.906                                   |
| 574.2000 | 175.6000 | 137.189            | 41.528             | 18820.734                          | 1724.600                           | 5697.213                                   |
| 581.4000 | 184.8000 | 144.389            | 50.728             | 20848.091                          | 2573.361                           | 7324.593                                   |
| 700.8000 | 184.2000 | 263.789            | 50.128             | 69584.467                          | 2512.847                           | 13223.279                                  |
| 789.0000 | 188.4000 | 351.989            | 54.328             | 123896.030                         | 2951.564                           | 19122.947                                  |
| 838.8000 | 184.6000 | 401.789            | 50.528             | 161434.143                         | 2553.109                           | 20301.700                                  |
| 928.4000 | 189.8000 | 491.389            | 55.728             | 241462.834                         | 3105.644                           | 27384.257                                  |
| 903.2000 | 207.0000 | 466.189            | 72.928             | 217331.885                         | 5318.537                           | 33998.349                                  |
| 852.4000 | 216.8000 | 415.389            | 82.728             | 172547.755                         | 6843.972                           | 34364.400                                  |
| 845.2000 | 216.2000 | 408.189            | 82.128             | 166617.998                         | 6745.058                           | 33523.843                                  |
| 785.8000 | 227.4000 | 348.789            | 93.328             | 121653.543                         | 8710.172                           | 32551.855                                  |
| 610.4000 | 218.0000 | 173.389            | 83.928             | 30063.634                          | 7043.960                           | 14552.217                                  |
| 585.8000 | 209.2000 | 148.789            | 75.128             | 22138.071                          | 5644.262                           | 11178.241                                  |
| 553.0000 | 194.4000 | 115.989            | 60.328             | 13453.374                          | 3639.504                           | 6997.400                                   |
| 577.2000 | 185.0000 | 140.189            | 50.928             | 19652.866                          | 2593.692                           | 7139.571                                   |
| 572.4000 | 167.6000 | 135.389            | 33.528             | 18330.094                          | 1124.147                           | 4539.353                                   |
| 608.8000 | 176.8000 | 171.789            | 42.728             | 29511.350                          | 1825.708                           | 7340.239                                   |
| 654.0000 | 162.2000 | 216.989            | 28.128             | 47084.087                          | 791.201                            | 6103.523                                   |
| 623.0000 | 173.8000 | 185.989            | 39.728             | 34591.789                          | 1578.338                           | 7389.014                                   |

|          |          |          |         |             |            |            |
|----------|----------|----------|---------|-------------|------------|------------|
| 493.8000 | 171.0000 | 56.789   | 36.928  | 3224.954    | 1363.699   | 2097.109   |
| 460.4000 | 167.4000 | 23.389   | 33.328  | 547.030     | 1110.776   | 779.505    |
| 446.4000 | 155.2000 | 9.389    | 21.128  | 88.147      | 446.405    | 198.367    |
| 354.8000 | 153.8000 | -82.211  | 19.728  | 6758.701    | 389.206    | -1621.890  |
| 343.6000 | 130.8000 | -93.411  | -3.272  | 8725.675    | 10.704     | 305.614    |
| 350.2000 | 128.6000 | -86.811  | -5.472  | 7536.205    | 29.939     | 475.005    |
| 318.4000 | 121.8000 | -118.611 | -12.272 | 14068.645   | 150.595    | 1455.562   |
| 288.4000 | 110.6000 | -148.611 | -23.472 | 22085.325   | 550.921    | 3488.160   |
| 297.6000 | 105.0000 | -139.411 | -29.072 | 19435.516   | 845.164    | 4052.924   |
| 248.8000 | 103.6000 | -188.211 | -30.472 | 35423.501   | 928.524    | 5735.119   |
| 213.0000 | 91.6000  | -224.011 | -42.472 | 50181.072   | 1803.845   | 9514.141   |
| 202.6000 | 95.6000  | -234.411 | -38.472 | 54948.667   | 1480.072   | 9018.202   |
| 208.4000 | 88.2000  | -228.611 | -45.872 | 52263.136   | 2104.213   | 10486.789  |
| 192.0000 | 81.6000  | -245.011 | -52.472 | 60030.547   | 2753.279   | 12856.160  |
| 186.8000 | 82.2000  | -250.211 | -51.872 | 62605.705   | 2690.673   | 12978.886  |
| 173.6000 | 90.8000  | -263.411 | -43.272 | 69385.524   | 1872.440   | 11398.255  |
| 213.6000 | 131.2000 | -223.411 | -2.872  | 49912.618   | 8.247      | 641.570    |
| 208.4000 | 139.2000 | -228.611 | 5.128   | 52263.136   | 26.299     | -1172.388  |
| 191.6000 | 132.0000 | -245.411 | -2.072  | 60226.716   | 4.292      | 508.418    |
| 190.8000 | 123.6000 | -246.211 | -10.472 | 60620.014   | 109.656    | 2578.251   |
|          |          | Mx:      | My:     | Sum:        | Sum:       | Sum:       |
|          |          | 437.011  | 134.072 | 2542766.353 | 139445.208 | 501343.917 |
|          |          |          |         |             |            |            |

X Values

$$\sum = 23161.6; \text{ Mean} = 437.011; \sum(X - Mx)^2 = SSx = 2542766.353$$

Y Values

$$\sum = 7105.8; \text{ Mean} = 134.072; \sum(Y - My)^2 = SSy = 139445.208$$

X and Y Combined

$$N = 53; \sum(X - Mx)(Y - My) = 501343.917$$

$$R \text{ Calculation; } r = \frac{\sum((X - My)(Y - Mx))}{\sqrt{(SSx)(SSy)}}$$

$$r = 501343.917 / \sqrt{(2542766.353)(139445.208)} = 0.8419$$

The P-Value is < .00001. The result is significant at  $p < .01$ .

**Table S5.** Data for Pearson’s coefficient of set-subset and subset.

| X values | Y values | $X - M_x$ | $Y - M_y$ | $(X - M_x)^2$ | $(Y - M_y)^2$ | $(X - M_x)(Y - M_y)$ |
|----------|----------|-----------|-----------|---------------|---------------|----------------------|
| 145.0000 | 40.4000  | -157.940  | -93.672   | 24944.924     | 8774.387      | 14794.473            |
| 166.2000 | 47.4000  | -136.740  | -86.672   | 18697.724     | 7511.983      | 11851.455            |
| 198.4000 | 51.8000  | -104.540  | -82.272   | 10928.533     | 6768.632      | 8600.652             |
| 203.4000 | 59.0000  | -99.540   | -75.072   | 9908.136      | 5635.760      | 7472.609             |
| 194.4000 | 65.2000  | -108.540  | -68.872   | 11780.850     | 4743.311      | 7475.308             |
| 195.6000 | 75.4000  | -107.340  | -58.672   | 11521.795     | 3442.368      | 6297.798             |
| 197.2000 | 79.2000  | -105.740  | -54.872   | 11180.868     | 3010.903      | 5802.113             |
| 200.2000 | 88.4000  | -102.740  | -45.672   | 10555.430     | 2085.904      | 4692.293             |
| 227.2000 | 81.2000  | -75.740   | -52.872   | 5736.490      | 2795.416      | 4004.482             |
| 270.2000 | 83.2000  | -32.740   | -50.872   | 1071.883      | 2587.930      | 1665.520             |
| 303.2000 | 82.2000  | 0.260     | -51.872   | 0.068         | 2690.673      | -13.506              |
| 373.0000 | 89.4000  | 70.060    | -44.672   | 4908.456      | 1995.561      | -3129.716            |
| 362.0000 | 104.0000 | 59.060    | -30.072   | 3488.128      | 904.307       | -1776.046            |
| 350.0000 | 136.2000 | 47.060    | 2.128     | 2214.679      | 4.530         | 100.159              |
| 368.4000 | 157.2000 | 65.460    | 23.128    | 4285.061      | 534.918       | 1513.987             |
| 398.6000 | 175.6000 | 95.660    | 41.528    | 9150.908      | 1724.600      | 3972.613             |
| 396.6000 | 184.8000 | 93.660    | 50.728    | 8772.266      | 2573.361      | 4751.232             |
| 516.6000 | 184.2000 | 213.660   | 50.128    | 45650.757     | 2512.847      | 10710.432            |
| 600.6000 | 188.4000 | 297.660   | 54.328    | 88601.700     | 2951.564      | 16171.383            |
| 654.2000 | 184.6000 | 351.260   | 50.528    | 123383.853    | 2553.109      | 17748.590            |
| 738.6000 | 189.8000 | 435.660   | 55.728    | 189799.964    | 3105.644      | 24278.613            |
| 696.2000 | 207.0000 | 393.260   | 72.928    | 154653.724    | 5318.537      | 28679.812            |
| 635.6000 | 216.8000 | 332.660   | 82.728    | 110662.927    | 6843.972      | 27520.428            |
| 629.0000 | 216.2000 | 326.060   | 82.128    | 106315.370    | 6745.058      | 26778.785            |
| 558.4000 | 227.4000 | 255.460   | 93.328    | 65260.004     | 8710.172      | 23841.683            |
| 392.4000 | 218.0000 | 89.460    | 83.928    | 8003.159      | 7043.960      | 7508.258             |
| 376.6000 | 209.2000 | 73.660    | 75.128    | 5425.851      | 5644.262      | 5533.979             |
| 358.6000 | 194.4000 | 55.660    | 60.328    | 3098.078      | 3639.504      | 3357.896             |
| 392.2000 | 185.0000 | 89.260    | 50.928    | 7967.415      | 2593.692      | 4545.879             |
| 404.8000 | 167.6000 | 101.860   | 33.528    | 10375.536     | 1124.147      | 3415.205             |
| 432.0000 | 176.8000 | 129.060   | 42.728    | 16656.581     | 1825.708      | 5514.531             |
| 491.8000 | 162.2000 | 188.860   | 28.128    | 35668.242     | 791.201       | 5312.322             |
| 449.2000 | 173.8000 | 146.260   | 39.728    | 21392.098     | 1578.338      | 5810.676             |
| 322.8000 | 171.0000 | 19.860    | 36.928    | 394.435       | 1363.699      | 733.410              |
| 293.0000 | 167.4000 | -9.940    | 33.328    | 98.796        | 1110.776      | -331.271             |
| 291.2000 | 155.2000 | -11.740   | 21.128    | 137.819       | 446.405       | -248.038             |
| 201.0000 | 153.8000 | -101.940  | 19.728    | 10391.687     | 389.206       | -2011.096            |
| 212.8000 | 130.8000 | -90.140   | -3.272    | 8125.152      | 10.704        | 294.910              |
| 221.6000 | 128.6000 | -81.340   | -5.472    | 6616.134      | 29.939        | 445.066              |
| 196.6000 | 121.8000 | -106.340  | -12.272   | 11308.115     | 150.595       | 1304.968             |
| 177.8000 | 110.6000 | -125.140  | -23.472   | 15659.925     | 550.921       | 2937.239             |

|          |          |          |         |             |            |            |
|----------|----------|----------|---------|-------------|------------|------------|
| 192.6000 | 105.0000 | -110.340 | -29.072 | 12174.832   | 845.164    | 3207.760   |
| 145.2000 | 103.6000 | -157.740 | -30.472 | 24881.789   | 928.524    | 4806.594   |
| 121.4000 | 91.6000  | -181.540 | -42.472 | 32956.635   | 1803.845   | 7710.296   |
| 107.0000 | 95.6000  | -195.940 | -38.472 | 38392.336   | 1480.072   | 7538.130   |
| 120.2000 | 88.2000  | -182.740 | -45.872 | 33393.770   | 2104.213   | 8382.577   |
| 110.4000 | 81.6000  | -192.540 | -52.472 | 37071.506   | 2753.279   | 10102.881  |
| 104.6000 | 82.2000  | -198.340 | -51.872 | 39338.606   | 2690.673   | 10288.213  |
| 82.8000  | 90.8000  | -220.140 | -43.272 | 48461.453   | 1872.440   | 9525.815   |
| 82.4000  | 131.2000 | -220.540 | -2.872  | 48637.725   | 8.247      | 633.323    |
| 69.2000  | 139.2000 | -233.740 | 5.128   | 54634.211   | 26.299     | -1198.687  |
| 59.6000  | 132.0000 | -243.340 | -2.072  | 59214.172   | 4.292      | 504.126    |
| 67.2000  | 123.6000 | -235.740 | -10.472 | 55573.170   | 109.656    | 2468.594   |
|          |          | Mx:      | My:     | Sum:        | Sum:       | Sum:       |
|          |          | 302.940  | 134.072 | 1679523.727 | 139445.208 | 361898.709 |
|          |          |          |         |             |            |            |

X Values

$\sum = 16055.8$ ; Mean = 302.94;  $\sum(X - M_x)^2 = SS_x = 1679523.727$

Y Values

$\sum = 7105.8$ ; Mean = 134.072;  $\sum(Y - M_y)^2 = SS_y = 139445.208$

X and Y Combined

$N = 53$ ;  $\sum(X - M_x)(Y - M_y) = 361898.709$

R Calculation

$r = \frac{\sum((X - M_x)(Y - M_y))}{\sqrt{(SS_x)(SS_y)}}$

$r = 361898.709 / \sqrt{(1679523.727)(139445.208)} = 0.7478$

The P-Value is  $< .00001$ . The result is significant at  $p < .01$ .

**Table S6.** Data for Pearson's coefficient of set and set-subset

| X values | Y values | $X - M_x$ | $Y - M_y$ | $(X - M_x)^2$ | $(Y - M_y)^2$ | $(X - M_x)(Y - M_y)$ |
|----------|----------|-----------|-----------|---------------|---------------|----------------------|
| 185.4000 | 145.0000 | -251.611  | -157.940  | 63308.257     | 24944.924     | 39739.397            |
| 213.6000 | 166.2000 | -223.411  | -136.740  | 49912.618     | 18697.724     | 30549.180            |
| 250.2000 | 198.4000 | -186.811  | -104.540  | 34898.470     | 10928.533     | 19529.185            |
| 262.4000 | 203.4000 | -174.611  | -99.540   | 30489.113     | 9908.136      | 17380.745            |
| 259.6000 | 194.4000 | -177.411  | -108.540  | 31474.777     | 11780.850     | 19256.158            |
| 271.0000 | 195.6000 | -166.011  | -107.340  | 27559.759     | 11521.795     | 17819.593            |
| 276.4000 | 197.2000 | -160.611  | -105.740  | 25795.996     | 11180.868     | 16982.980            |
| 288.6000 | 200.2000 | -148.411  | -102.740  | 22025.920     | 10555.430     | 15247.723            |
| 308.4000 | 227.2000 | -128.611  | -75.740   | 16540.872     | 5736.490      | 9740.973             |
| 353.4000 | 270.2000 | -83.611   | -32.740   | 6990.853      | 1071.883      | 2737.403             |
| 385.4000 | 303.2000 | -51.611   | 0.260     | 2663.728      | 0.068         | -13.438              |
| 462.4000 | 373.0000 | 25.389    | 70.060    | 644.585       | 4908.456      | 1778.740             |
| 466.0000 | 362.0000 | 28.989    | 59.060    | 840.344       | 3488.128      | 1712.082             |

|          |          |          |          |             |             |             |
|----------|----------|----------|----------|-------------|-------------|-------------|
| 486.2000 | 350.0000 | 49.189   | 47.060   | 2419.526    | 2214.679    | 2314.838    |
| 525.6000 | 368.4000 | 88.589   | 65.460   | 7847.954    | 4285.061    | 5799.048    |
| 574.2000 | 398.6000 | 137.189  | 95.660   | 18820.734   | 9150.908    | 13123.521   |
| 581.4000 | 396.6000 | 144.389  | 93.660   | 20848.091   | 8772.266    | 13523.498   |
| 700.8000 | 516.6000 | 263.789  | 213.660  | 69584.467   | 45650.757   | 56361.189   |
| 789.0000 | 600.6000 | 351.989  | 297.660  | 123896.030  | 88601.700   | 104773.083  |
| 838.8000 | 654.2000 | 401.789  | 351.260  | 161434.143  | 123383.853  | 141132.443  |
| 928.4000 | 738.6000 | 491.389  | 435.660  | 241462.834  | 189799.964  | 214078.577  |
| 903.2000 | 696.2000 | 466.189  | 393.260  | 217331.885  | 154653.724  | 183333.536  |
| 852.4000 | 635.6000 | 415.389  | 332.660  | 172547.755  | 110662.927  | 138183.355  |
| 845.2000 | 629.0000 | 408.189  | 326.060  | 166617.998  | 106315.370  | 133094.155  |
| 785.8000 | 558.4000 | 348.789  | 255.460  | 121653.543  | 65260.004   | 89101.688   |
| 610.4000 | 392.4000 | 173.389  | 89.460   | 30063.634   | 8003.159    | 15511.417   |
| 585.8000 | 376.6000 | 148.789  | 73.660   | 22138.071   | 5425.851    | 10959.830   |
| 553.0000 | 358.6000 | 115.989  | 55.660   | 13453.374   | 3098.078    | 6455.974    |
| 577.2000 | 392.2000 | 140.189  | 89.260   | 19652.866   | 7967.415    | 12513.294   |
| 572.4000 | 404.8000 | 135.389  | 101.860  | 18330.094   | 10375.536   | 13790.742   |
| 608.8000 | 432.0000 | 171.789  | 129.060  | 29511.350   | 16656.581   | 22171.112   |
| 654.0000 | 491.8000 | 216.989  | 188.860  | 47084.087   | 35668.242   | 40980.564   |
| 623.0000 | 449.2000 | 185.989  | 146.260  | 34591.789   | 21392.098   | 27202.774   |
| 493.8000 | 322.8000 | 56.789   | 19.860   | 3224.954    | 394.435     | 1127.845    |
| 460.4000 | 293.0000 | 23.389   | -9.940   | 547.030     | 98.796      | -232.475    |
| 446.4000 | 291.2000 | 9.389    | -11.740  | 88.147      | 137.819     | -110.220    |
| 354.8000 | 201.0000 | -82.211  | -101.940 | 6758.701    | 10391.687   | 8380.591    |
| 343.6000 | 212.8000 | -93.411  | -90.140  | 8725.675    | 8125.152    | 8420.061    |
| 350.2000 | 221.6000 | -86.811  | -81.340  | 7536.205    | 6616.134    | 7061.200    |
| 318.4000 | 196.6000 | -118.611 | -106.340 | 14068.645   | 11308.115   | 12613.083   |
| 288.4000 | 177.8000 | -148.611 | -125.140 | 22085.325   | 15659.925   | 18597.165   |
| 297.6000 | 192.6000 | -139.411 | -110.340 | 19435.516   | 12174.832   | 15382.593   |
| 248.8000 | 145.2000 | -188.211 | -157.740 | 35423.501   | 24881.789   | 29688.383   |
| 213.0000 | 121.4000 | -224.011 | -181.540 | 50181.072   | 32956.635   | 40666.931   |
| 202.6000 | 107.0000 | -234.411 | -195.940 | 54948.667   | 38392.336   | 45930.466   |
| 208.4000 | 120.2000 | -228.611 | -182.740 | 52263.136   | 33393.770   | 41776.346   |
| 192.0000 | 110.4000 | -245.011 | -192.540 | 60030.547   | 37071.506   | 47174.387   |
| 186.8000 | 104.6000 | -250.211 | -198.340 | 62605.705   | 39338.606   | 49626.819   |
| 173.6000 | 82.8000  | -263.411 | -220.140 | 69385.524   | 48461.453   | 57987.269   |
| 213.6000 | 82.4000  | -223.411 | -220.540 | 49912.618   | 48637.725   | 49271.048   |
| 208.4000 | 69.2000  | -228.611 | -233.740 | 52263.136   | 54634.211   | 53435.524   |
| 191.6000 | 59.6000  | -245.411 | -243.340 | 60226.716   | 59214.172   | 59718.298   |
| 190.8000 | 67.2000  | -246.211 | -235.740 | 60620.014   | 55573.170   | 58041.764   |
|          |          | Mx:      | My:      | Sum:        | Sum:        | Sum:        |
|          |          | 437.011  | 302.940  | 2542766.353 | 1679523.727 | 2041422.436 |
|          |          |          |          |             |             |             |

*X Values*

$\Sigma = 23161.6$ ; Mean = 437.011;  $\Sigma(X - Mx)^2 = SSx = 2542766.353$

*Y Values*;  $\Sigma = 16055.8$ ; Mean = 302.94;  $\Sigma(Y - My)^2 = SSy = 1679523.727$

*X and Y Combined*

$N = 53$ ;  $\Sigma(X - Mx)(Y - My) = 2041422.436$

*R Calculation*

$r = \Sigma((X - My)(Y - Mx)) / \sqrt{(SSx)(SSy)}$

$r = 2041422.436 / \sqrt{(2542766.353)(1679523.727)} = 0.9878$

The P-Value is < .00001. The result is significant at  $p < .01$ .
